1 **A D-amino acid produced by plant-bacteria metabolic crosstalk empowers interspecies**  
2 **competition**

3

4 Alena Aliashkevich<sup>1</sup>, Matthew Howell<sup>2, 3#</sup>, Gabriella Endre<sup>4</sup>, Eva Kondorosi<sup>4</sup>, Pamela J.B. Brown<sup>2</sup>  
5 and Felipe Cava<sup>1\*</sup>

6

7 <sup>1</sup>Department of Molecular Biology and Laboratory for Molecular Infection Medicine Sweden,  
8 Umeå Centre for Microbial Research, Umeå University, Umeå, Sweden

9 <sup>2</sup>Division of Biological Sciences, University of Missouri, Columbia, MO, 65201, USA

10 <sup>3</sup>Department of Biology and Environmental Science, Westminster College, Fulton, MO 65251,  
11 USA

12 <sup>4</sup>Institute of Plant Biology, Biological Research Centre, Szeged, Hungary

13 # Current address.

14

15

16 \*for correspondence. E-mail: [felipe.cava@umu.se](mailto:felipe.cava@umu.se)

17

18 Running title: Interspecies competition by D-amino acids.

19 Keywords: D-amino acids, canavanine, peptidoglycan, cell division, *Agrobacterium tumefaciens*,  
20 Rhizobiales, PBP3a.

21

22 **Abstract**

23 The bacterial cell wall is made of peptidoglycan (PG), a polymer that is essential for  
24 maintenance of cell shape and survival. Many bacteria alter their PG chemistry as a strategy to  
25 adapt their cell wall to environmental challenges. Therefore, identifying these factors is  
26 important to better understand the interplay between microbes and their habitat. Here we used  
27 the soil bacterium *Pseudomonas putida* to uncover cell wall modulators from plant extracts and  
28 found canavanine (CAN), a non-proteinogenic amino acid. We demonstrated that cell wall  
29 chemical editing by CAN is licensed by *P. putida* BsrP, a broad-spectrum racemase which  
30 catalyzes production of D-CAN. Remarkably, D-CAN alters dramatically the PG structure of  
31 Rhizobiales (e.g. *Agrobacterium tumefaciens*, *Sinorhizobium meliloti*), impairing PG synthesis,  
32 crosslinkage and cell division. Using *A. tumefaciens* we demonstrated that the detrimental effect  
33 of D-CAN is suppressed by a single amino acid substitution in the cell division PG  
34 transpeptidase penicillin binding protein 3a. Collectively, this work provides a fascinating  
35 example of how interspecies metabolic crosstalk can be a source of novel cell wall regulatory  
36 molecules to govern microbial biodiversity.

## 37 **Introduction**

38 Bacteria establish a myriad of complex social structures with other living organisms in the  
39 biosphere that frequently involve competitive and cooperative behaviours [1, 2]. For instance,  
40 many mutualists rely on each other for nutrients and protection [3–6]. Evolution has  
41 consolidated these partnerships by selecting specific mechanisms which provide a mutual  
42 benefit to the partners, making the interactions more efficient and robust. A representative  
43 example of mutualism is the case of legume plants and rhizobia bacteria. Legumes produce  
44 flavonoid signals to recruit nitrogen fixing bacteria to the plant. Microbes provide nitrogen in  
45 return for energy-containing carbohydrates [7–11]. Ecologists consider that these type of plant-  
46 bacteria interactions are more widespread in nature than was previously thought [12, 13].

47 The development of specific social relationships often requires communication strategies. One  
48 such strategy is the production and release of small diffusible molecules, which facilitate  
49 interactions between organisms in the distance and often are instrumental to shape the  
50 biodiversity, dynamics and ultimately, the biological functions of the ecosystems [14, 15]. Many  
51 taxonomically unrelated bacteria produce non-canonical D-amino acids (NCDAA) to the  
52 extracellular milieu in order to regulate diverse cellular processes at a population level. The  
53 regulatory properties of NCDAA seem to be specific for each D-amino acid, e.g. D-Met and D-  
54 Leu downregulate peptidoglycan (PG) synthesis [16–18], D-Ala represses spore germination  
55 [19] and D-Arg affects phosphate uptake [20] (reviewed in [21]).

56 The modulatory effects of NCDAA on the cell wall require that these molecules replace the  
57 canonical D-Alanine located at the terminal position (4<sup>th</sup> or 5<sup>th</sup>) of the PG peptide stems. NCDAA  
58 editing at 4<sup>th</sup> position is catalysed by LD-transpeptidases (Ldts), which are enzymes involved in  
59 PG crosslinking (i.e. dimer synthesis) through the formation of meso-diaminopimelic acid  
60 (mDAP-mDAP) peptide bridges [17]. In contrast, incorporation of NCDAA at the 5<sup>th</sup> is mediated  
61 by penicillin binding proteins (PBPs) with DD-transpeptidase activity [22] or by synthesis of

62 modified precursors in the cytoplasmic *de novo* synthetic pathway [17]. Since muropeptides are  
63 substrates for many enzymes, PG changes induced by NCDAA can have an obvious impact on  
64 the enzymes that synthesize and remodel the PG.

65 Production of many NCDAA depends on the enzyme broad-spectrum racemase (Bsr), which  
66 converts L-amino acids, protein building blocks, into D-amino acids, regulatory molecules [23].  
67 The wide distribution of Bsr-bacteria [23] and the metabolic investment in producing NCDAA  
68 suggests an important physiological role for these molecules. It is worth mentioning that the  
69 capacity to incorporate NCDAA in the PG is widespread in bacteria. The fact that non-producer  
70 organisms can be also influenced by PG editing suggests that NCDAA can act as engines of  
71 biodiversification within poly-microbial communities [20].

72 Although the implications of NCDAA in microbial ecology is rapidly growing, yet most studies  
73 focus on the production of D-amino acids from their proteinogenic L-counterparts while non-  
74 proteinogenic amino acids are much less studied. Here, we report that Bsr of soil bacterium  
75 *Pseudomonas putida* (BsrP) can effectively produce D-canavanine (D-CAN) from plant derived  
76 L-canavanine (L-CAN), an allelopathic non-proteinogenic amino acid produced by many  
77 agronomically important legumes (e.g. alfalfa, jack beans) in high amounts [24–26].

78 Previous studies have reported that L-CAN causes growth inhibition of non-producer plants due  
79 to the induction of systemic protein misfolding associated with the capacity of L-CAN to replace  
80 L-Arginine in proteins [27–30]. Our results show that conversion of L- into D-CAN by BsrP  
81 eliminates the toxic effect of L-CAN in the growth of *Arabidopsis thaliana*.

82 Since this is the first time enzymatic D-CAN production is reported we decided to investigate the  
83 biological activity of this plant-derived D-amino acid on the physiology of rhizosphere microbes.  
84 We found that D-CAN is incorporated in high amounts in the cell wall of certain Rhizobiales  
85 species. Cell wall chemical editing by D-CAN affects PG synthesis and structure which causes  
86 cell division impairment and fitness loss. Using the plant pathogen *Agrobacterium tumefaciens*

87 we demonstrated that D-CAN deleterious effects on cell wall integrity can be alleviated by just a  
88 single amino acid substitution in the cell division PG transpeptidase penicillin binding protein 3a  
89 (PBP3a).

90 **Materials and Methods**

91 **Media and growth conditions**

92 Detailed information about strains and growth conditions is listed in supplementary materials  
93 and methods. All strains were grown at the optimal temperature and in LB (Luria Bertani broth)  
94 medium unless otherwise stated. Growth of diverse rhizobial species shown in Figure 2 was  
95 performed at room temperature.

96

97 **Seed extract preparation and use of *P. putida* as a reporter**

98 3 gr of seeds (e.g. *Medicago sativa*) were mashed and soaked in 10 mL of water overnight  
99 followed by centrifugation at 5,000 rpm to remove the particulate fraction. The supernatant was  
100 next (i.e. extract) filter-sterilized and concentrated 5x. *P. putida* were grown either in LB medium  
101 or in LB medium supplemented with seed extract to a final concentration 1x. Cultures were  
102 grown up to stationary phase prior PG purification and analysis by liquid chromatography and by  
103 mass spectrometry.

104

105 **Peptidoglycan analysis**

106 PG isolation and analysis were done according previously described methods [31, 32]. In brief,  
107 PG sacculi were obtained by boiling bacterial cells in SDS 5%. SDS was removed by  
108 ultracentrifugation, and the insoluble material was further digested with muramidase (Cellosyl).  
109 Soluble muropeptides were separated by liquid chromatography (high-performance liquid  
110 chromatography and/or ultra high-pressure liquid chromatography) and identified by mass  
111 spectrometry. A detailed protocol is described in supplementary materials and methods.

112

113 **Protein expression and purification**

114 *P. putida* gene PP3722 encoding broad-spectrum racemase was amplified with FCP1097 (5'-  
115 AAAACATATGCCCTTTTCGCCGTACC-3') and FCP1098 (5'-  
116 AAAAGCGGCCGCGTCGACGAGTAT-3') primers and cloned in pET22b for expression in *E.*  
117 *coli* Rosetta 2 (DE3) cells, resulting in C-terminal His-tagged protein.  
118 Protein was purified using Ni-NTA agarose column (Qiagen). A detailed protocol is described in  
119 supplementary materials and methods.

120

### 121 **Racemase activity assay**

122 5 µg of purified racemase and various concentration of L-canavanine in 50 µl of 50 mM sodium  
123 phosphate buffer pH 7.5 were incubated at 37 °C for 30 min, then heat inactivated (5 min,  
124 100°C), and centrifuged (15,000 rpm, 10 min). Supernatant was derivatized with Marfey's  
125 reagent [33] and resolved by high-performance liquid chromatography as described previously  
126 [23]. Detailed protocols are available in supplementary materials and methods.

127

### 128 ***BsrP* mutant construction in *P. putida***

129 For deletion of PP3722 in *P. putida* the upstream and downstream regions of the gene were  
130 amplified from purified genomic DNA with primers FCP1145 (5'-  
131 AAAATCTAGATCATCAGCAGCGACAT-3') and FCP1092 (5'-  
132 CAATGGCAATTGGTGATTACTCGTGTTTC-3'); FCP1093 (5'-  
133 GAGTAATCACCAATTGCCATTGAAAGGAG-3') and FP1146 (5'-  
134 AAAATCTAGAGCGACGTCACGC-3') respectively. The upstream and downstream fragments  
135 were combined with FCP1145 and FCP1146 into a 1010 bp fragment, and inserted into  
136 pCVD442 [34]. *E. coli* DH5α λPIR was used in the cloning and the resulting plasmid  
137 pCVD442*bsrP* was confirmed by sequencing. In-frame deletion was introduced by allele

138 replacement via homologous recombination. In short, exconjugants were obtained by  
139 conjugating with Sm10  $\lambda$ PIR containing pCVD442*bsrP* and selected on LB plates with  
140 chloramphenicol 25  $\mu$ g/ml and carbenicillin 1,000  $\mu$ g/ml. Exconjugants were grown in LB with  
141 10% sucrose (w/v) medium overnight and then plated on LB plates with chloramphenicol 25  
142  $\mu$ g/ml and 10% (w/v) sucrose. Colonies sensitive to carbenicillin were confirmed by PCR.

143

#### 144 ***A. thaliana* growth**

145 *A. thaliana* was grown in 1/2 MS agar medium (half strength of Murashige and Skoog basal salt  
146 mixture (Sigma), 0.5% sucrose, 1% agar, with pH adjusted to 5.7) with or without canavanine  
147 supplementation. Ethanol sterilized seeds were pre-incubated on the plates in the darkness at  
148 4°C for 3 days before moving to the *in vitro* chamber with day/night cycle 16/8 hours,  
149 22°C/18°C. Root length was measured after 10 days of growth in the chamber with Fiji [35].  
150 Pictures of the root hairs were taken with stereomicroscope Nikon SMZ1500 (Tokyo, Japan).

151

#### 152 **Growth curves and relative growth**

153 At least three replicates per strain and growth condition were grown in 200  $\mu$ l of LB alone or  
154 supplemented with canavanine in a 96-well plate at 30°C with 140 rpm shaking in a BioTek Eon  
155 Microplate Spectrophotometer (BioTek, Winooski, VT, USA). The A600 was measured at 10  
156 minutes intervals. Relative growth was calculated as a percentage of growth in the presence of  
157 DL-canavanine compared to growth without canavanine.

158

#### 159 **Phase contrast microscopy**

160 Stationary phase bacteria were placed on 1% agarose LB pads. Phase contrast microscopy  
161 was done using a Zeiss Axio Imager.Z2 microscope (Zeiss, Oberkochen, Germany) equipped



162 with a Plan-Apochromat 63X phase contrast objective lens and an ORCA-Flash 4.0 LT digital  
163 CMOS camera (Hamamatsu Photonics, Shizuoka, Japan), using the Zeiss Zen Blue software.

164

#### 165 **Quantification of cell constrictions**

166 Exponentially growing cells ( $OD_{600}=0.4-0.6$ ) in ATGN medium [36] were imaged on 1% agarose  
167 ATGN pads using phase contrast microscopy (inverted Nikon Eclipse TiE (Tokyo, Japan) with a  
168 QImaging Rolera em-c2 1K EMCCD camera (Surrey, British Columbia, Canada), and Nikon  
169 Elements Imaging Software) as described previously [37]. Cell length and constrictions were  
170 detected using MicrobeJ software [35]. Old poles were identified as having a larger maximum  
171 width compared to the new poles. The longitudinal position of cell constrictions was then plotted  
172 against cell length. A longitudinal position of 0 represents the true midcell while positive values  
173 approach the new pole and negative values approach the old cell.

174

#### 175 **Suppressor mutants**

176 To obtain suppressor mutants, *A. tumefaciens* was grown at optimal conditions overnight (see  
177 supplementary methods), and serial dilutions were inoculated on the LB plates containing DL-  
178 CAN 10 mM. Plates were incubated at room temperature until suppressor mutant colonies  
179 arose. For confirmation of the resistance, the selected colonies were passed through LB plates  
180 before being tested on LB plates containing DL-CAN 10 mM.

181

#### 182 **Whole-genome sequencing and single-nucleotide polymorphism analysis**

183 Genomic DNA was isolated from suppressor mutants and the parental strain of *A. tumefaciens*.  
184 Indexed paired-end libraries were prepared and sequenced in a MiSeq sequencer (Illumina,  
185 San Diego, CA, USA) according to the manufacturer's instructions.

186 Data quality control was performed with FastQC v0.11.5 [38] and MultiQC v1.5 [39]. The raw  
187 data in FASTQ format was trimmed using Trimmomatic v0.36 with arguments  
188 'ILLUMINACLIP:adapters.fa:2:30:10','SLIDINGWINDOW:5:30' and 'MINLEN:50' [40]. The exact  
189 adapter sequences that were used can be retrieved from the supplementary materials and  
190 methods. The trimmed FASTQ was aligned to genome GCF\_000092025.1\_ASM9202v1 (*A.*  
191 *tumefaciens*, [41]) using the 'mem' algorithm in BWA v0.7.15-r1140 [42] with default parameters  
192 and subsequently converted to sorted BAM format. Optical duplicates were marked using picard  
193 tools v2.18.2 with default arguments [43]. Finally, variants were called in freebayes v1.1.0-dirty  
194 using the parameters '-p 1', '--min-coverage 5' and '--max-coverage 500' [44].

195

#### 196 **Reconstruction of suppressor mutant *pbp3a*<sup>K537R</sup> in *A. tumefaciens***

197 For reconstruction of point mutation in *pbp3a*<sup>K537R</sup> in *A. tumefaciens*, a 650 bp fragment  
198 containing the mutated nucleotide was amplified from purified genomic DNA with primers  
199 FCP3354 (5'-AAAAGGATCCCGACACCGTTGG-3') and FCP3355 (5'-  
200 AAAAGGATCCATAAGACACGAGCA-3') and inserted into pNPTS139 plasmid [45]. *E. coli*  
201 DH5α λPIR was used in the cloning and the resulting plasmid pNPTS139*pbp3a*<sup>K537R</sup> was  
202 confirmed by sequencing.

203 Nucleotide substitution in *A. tumefaciens pbp3a* gene (atu2100) was done according to an  
204 established allelic-replacement protocol [46]. In short, exconjugants were obtained by  
205 conjugating with *E. coli* S17-1 λPIR containing pNPTS139*pbp3a*<sup>K537R</sup> and selected on ATGN  
206 plates with kanamycin 300 µg/ml. Exconjugants were grown in ATGN medium overnight and  
207 then plated on ATSN plates with 5% (w/v) sucrose [36]. Colonies sensitive to kanamycin were  
208 streak-purified twice on ATSN plates and sequenced.

209

210 **PBP3a protein folding prediction**

211 Prediction of PBP3a protein was done by Phyre2 [47].

212

213 **Results**

214 **Bacterial racemization of canavanine licenses its incorporation into the cell wall**

215 To identify new environmental modulators of the bacterial cell wall we tested the capacity of  
216 diverse plant extracts to induce changes in the PG chemical structure of soil associated  
217 bacteria. We found that our reporter strain *Pseudomonas putida* displayed new muropeptides  
218 when we supplemented its growth medium with alfalfa (*M. sativa*) seed extract. By mass  
219 spectrometry, we identified that the modification corresponded to a molecule of 176.2807 mass  
220 units that was replacing the D-Alanine normally found at fourth position of the peptides stems  
221 within the bacterial PG (Fig. 1a). *In silico* analyses suggested L-canavanine (L-CAN), a non-  
222 proteinogenic amino acid similar to L-arginine and found in legumes as the most likely  
223 candidate. Consistently, supplementation of *P. putida* with pure L-CAN produced the same  
224 monomeric muropeptide, now renamed as M4<sup>CAN</sup>, but also its crosslinked dimeric form D44<sup>CAN</sup>  
225 (Fig. 1b). Since the fourth position in the peptide moiety of muropeptides is normally restricted to  
226 D-amino acids, we hypothesized that *P. putida* might have produced D-CAN from L-CAN. In  
227 fact, we found that *P. putida* genome encodes a putative broad-spectrum racemase orthologue  
228 (PP3722). To test whether PP3722 could racemize canavanine we purified the protein and  
229 performed *in vitro* racemization (reversible interconversion between L-AA and D-AA  
230 enantiomers) assays using pure L-CAN as substrate. Indeed, using High Performance Liquid  
231 Chromatography (HPLC) we observed that PP3722 converted L-CAN into D-CAN and hence  
232 we named this protein as BsrP for Broad-spectrum racemase in P. putida (Fig. 1c).  
233 Consistently, deletion of *bsrP* in *P. putida* produced a strain incapable to make D-CAN-  
234 containing muropeptides in L-CAN supplemented cultures (Fig. 1d). *P. putida*  $\Delta$ *bsrP* was only  
235 able to produce a PG edited with CAN when this was exogenously added as D-form. Since we  
236 did not succeed in purifying D-CAN, we used DL-CAN racemic mixture as a source of D-CAN  
237 (DL-CAN) (Fig. S1a). In agreement, D-CAN containing supernatants (from wild-type (wt) *P.*

238 *putida*) induced production of D-CAN muropeptides in *E.coli*, a bacterium that lacks broad-  
239 spectrum racemase (Fig. S1b), further supporting that PG modification by D-CAN is Bsr-  
240 independent. As expected, no D-CAN muropeptides were induced in *E. coli* when this bacterium  
241 was cultured with preconditioned media from the  $\Delta bsrP$  strain. Collectively, these results  
242 indicate that bacterial broad-spectrum racemase BsrP can change the chirality of plant-derived  
243 amino acid L-CAN, thereby licensing its D-form for PG editing.

244

### 245 **Enantiomerization changes the functionality of canavanine**

246 Previous studies showed that production of L-CAN by legumes underlies a defensive strategy  
247 against certain competitors (e.g. plants, insects) [27, 48, 49] based on the incorporation of this  
248 toxic atypical amino acid into proteins due to its chemical similarities with L-arginine [28–30].  
249 Compared to L-CAN, there is virtually no information about D-CAN. Thus, to understand the  
250 biological role of this D-amino acid we first checked if D-CAN displayed the same activity as L-  
251 CAN. In agreement with previous reports, L-CAN inhibited root growth of *A. thaliana* seedlings  
252 at 5  $\mu\text{M}$  concentration with the resulting root length almost 3 times shorter than in control (Fig.  
253 2). However, the average root length in the presence of DL-CAN 5  $\mu\text{M}$  was 1.5 times longer  
254 than that grown with the same concentration of L-CAN suggesting that CAN enantiomers have  
255 different functions. Indeed, additional experiments comparing root lengths at L-CAN 5  $\mu\text{M}$   
256 versus DL-CAN 10  $\mu\text{M}$  (i.e. 5  $\mu\text{M}$  D-CAN + 5  $\mu\text{M}$  L-CAN), and L-CAN 10  $\mu\text{M}$  versus DL-CAN 20  
257  $\mu\text{M}$  (i.e. 10  $\mu\text{M}$  D-CAN + 10  $\mu\text{M}$  L-CAN), where in both cases amount of L-form is the same,  
258 revealed no significant differences between them (Fig. S2a) and suggests that only L-CAN  
259 inhibits root development in *A. thaliana*. Interestingly, in addition to tap root length, development  
260 of lateral roots and root hairs were also affected by L-CAN, but not by D-CAN (Fig. S2b).  
261 Collectively, these results stress the idea that CAN enantiomers have different activities.

262

## 263 **D-CAN severely alters cell wall composition and abundance in Rhizobiales**

264 To ascertain the physiological role of D-CAN we investigated its effect on bacterial growth using  
265 diverse bacteria species that can potentially be exposed to this D-amino acid in the natural  
266 environment. We found that Rhizobiales were the most affected species by DL-CAN (Fig. 3a)  
267 while *P. putida* growth was not affected even at high levels of DL-CAN (up to 10 mM) (Fig. S3)  
268 suggesting that producer species (i.e. encoding a broad-spectrum racemase) might have  
269 developed tolerance to D-CAN.

270 Although D-CAN induced PG modifications in all species tested, Rhizobiales displayed the  
271 highest levels of muro<sup>CAN</sup>, i.e. ca. 40% of the muropeptides were edited by D-CAN both in the 4<sup>th</sup>  
272 and 5<sup>th</sup> positions of the peptide moieties (Fig. 3a, b, Fig. S4a). Therefore, we hypothesized that  
273 D-CAN might be interfering in cell wall biosynthesis, in a similar way as has been reported for  
274 other NCDAAAs (e.g. D-Met [20, 50]). Indeed, *A. tumefaciens* cells treated with DL-CAN  
275 contained less PG than non-treated cells (Fig. 3c) or cells treated with L-CAN (Fig. S4b). To  
276 investigate the consequences of D-CAN incorporation on the PG architecture, we added  
277 increasing concentrations of DL-CAN to *A. tumefaciens* and monitored fluctuation of the  
278 different PG components. Our results show that D-CAN causes a dramatic increase in  
279 pentapeptides (M5 and D45) (Fig. 3b, d), and a reduction in crosslinkage due to lower amount  
280 of LD-crosslinked muropeptides (Fig. 3e). L-CAN alone did not change *A. tumefaciens* PG  
281 crosslinkage at tested concentration (Fig. S4c).

282 To know if the effects of D-CAN in *A. tumefaciens*' PG extend to other Rhizobiales, we analyzed  
283 both PG composition and amount in the legume symbiont *Sinorhizobium meliloti*. As in *A.*  
284 *tumefaciens*, we found the same types of D-CAN modified muropeptides, reduction in PG  
285 density and crosslinkage in *S. meliloti* treated with D-CAN (Fig. S5a, S5b, S5c). Interestingly,  
286 we had to use lower concentration of the compound, since *S. meliloti* was more sensitive to D-

287 CAN than *A. tumefaciens*. These results suggest that D-CAN downregulates PG synthesis and  
288 crosslinkage likely through its incorporation in the cell wall.  
289 Given the effects of D-CAN in *S. meliloti*, we decided to explore the effect of this D-amino acid  
290 on *Medicago sativa*, a legume which produces L-CAN and establishes symbiosis with  
291 *Sinorhizonium medicae* for nitrogen fixation. Pre-treatment of *S. medicae* with DL-CAN delayed  
292 nodulation, reduced the nodule number and caused early senescence and disintegration of the  
293 nitrogen-fixing nodule zone (Fig. S6a, b). As a consequence of the lack of active persistent  
294 nitrogen-fixing cells, the aerial part of plants was underdeveloped and similar to the non-  
295 infected, nitrogen-starving plants (Fig. S6c). Collectively, our data demonstrates that D-CAN  
296 activity can affect the fitness of certain rhizobia and as a consequence, their symbiotic  
297 relationship with plants.

298

### 299 **D-CAN impairs viability and cell separation**

300 To gain further insights on D-CAN's mechanism of action we cultured *A. tumefaciens* with or  
301 without L- or DL-CAN and monitored growth and morphology. Our results showed that D-CAN  
302 inhibited growth of *A. tumefaciens* in liquid culture and induced lysis, branching and bulging  
303 (Fig. 4a). No significant changes in growth or morphology were caused by L-CAN (Fig. 4a)  
304 further strengthening the idea that these enantiomers have different functions. To get more  
305 quantitative insights of the morphological defects caused by D-CAN we measured cell length,  
306 longitudinal position of the constriction (Fig. 4b), and the number of constrictions per cell (Fig.  
307 4c). While in the untreated culture, or in cultures treated with L-CAN, *A. tumefaciens* division  
308 sites localized slightly closer to the new pole (Fig. 4b, Fig. S7a), in DL-CAN treated cultures  
309 cells were up to 1.5 times longer and the position of the constrictions exhibited a more scattered  
310 pattern (Fig. 4b). In addition, untreated cells and cells treated with L-CAN had 0 or 1 constriction  
311 per cell, while DL-CAN induced up to 3 constrictions per cell (Fig. 4c, Fig. S7a). As before, *S.*

312 *meliloti* grown on DL-CAN recapitulated the results obtained with *A. tumefaciens* on growth,  
313 morphology and number of constrictions (Fig. S7b, c, d) further supporting that D-CAN  
314 interferes with the cell division.

315

### 316 **D-CAN interfere with a cell division transpeptidation**

317 To identify the molecular targets of D-CAN, we screened for suppressor mutants resistant to  
318 DL-CAN. Characterization of the single-nucleotide polymorphism by genome sequencing  
319 revealed a K537R substitution in the primary cell division transpeptidase PBP3a (*atu2100*) [51,  
320 52]. Phyre2 alignments [47] of *A. tumefaciens* PBP3a to crystallized PBP3 proteins localized  
321 K537 in the loop between  $\beta 5$  and  $\lambda 11$ , close to the active-site cleft (Fig. 5a).

322 Reconstruction of the K537R mutation (i.e. *A. tumefaciens* PBP3a<sup>K537R</sup>) recapitulated the  
323 suppressor tolerance to DL-CAN (Fig. 5b). Interestingly, K537R substitution appeared to be  
324 specific since it did not suppress the growth inhibitory effect of D-amino acids other than D-Arg,  
325 a chemical analogue of D-CAN (Fig S8). No difference in the growth of the wt and PBP3a<sup>K537R</sup>  
326 strains was detected in the absence or presence of L-CAN (Fig. S9a). In addition to growth, PG  
327 reduction was partially alleviated in the PBP3a<sup>K537R</sup> strain (Fig. 5c). Both wild-type vs the  
328 PBP3a<sup>K537R</sup> strains showed similar levels of D-CAN containing muropeptides (muro<sup>CAN</sup>) in  
329 cultures supplemented with DL-CAN indicating that the suppressing role of the PBP3a<sup>K537R</sup>  
330 mutations is not associated with a reduction of D-CAN incorporation in the PG (Fig. S9e).

331 Consistent with the idea that D-CAN inhibits PBP3a activity, the PBP3a<sup>K537R</sup> strain showed a  
332 reduction in the accumulation of pentapeptides (i.e. M5) compared to that of the wild-type in the  
333 presence of D-CAN (Fig. 5d, Fig. S9b). Overall crosslinkage levels and particularly LD-  
334 crosslinkage also improved in the PBP3a<sup>K537R</sup> strain (Fig. 5e, Fig. S9c), while no difference  
335 between strains was observed in control condition (Fig. S9d). Similarly, altered cell length and  
336 constriction positioning in the presence of DL-CAN improved in the PBP3a<sup>K537R</sup> strain compared



337 to wt (Fig. 5f), while no difference was observed in the control condition or in the presence of L-  
338 CAN (Fig. 5f, Fig. S9f). Collectively, these data suggest that D-CAN interfere with PG  
339 transpeptidation at cell division.

340 **Discussion**

341 Bacteria can edit the canonical chemistry of their cell wall as a strategy to cope with  
342 environmental challenges [53–55]. As PG can be modified by secreted molecules, we reasoned  
343 that we could use bacteria as a biochemical trap to discover elusive environmental modulators  
344 of the cell wall. To test this, we exposed plant-derived soluble extracts to the soil bacteria *P.*  
345 *putida* and discovered canavanine (CAN) as a new PG modulator. The fact that L-CAN was  
346 previously reported to be produced by legume plants [24–26] further supported the efficacy of  
347 our screening. However, CAN was found at the terminal position of the PG peptide moieties,  
348 which is reserved for D-amino acids [16]. Remarkably, we found that *P. putida* encodes a broad-  
349 spectrum racemase (Bsr) that changes the chirality of CAN to permit its incorporation in the  
350 bacterial PG. Collectively, these observations underscore a fascinating example of interspecies  
351 metabolic crosstalk where a plant-derived metabolite (L-CAN) is transformed by a bacterial  
352 enzyme (BsrP) into a previously unrecognized molecule (D-CAN) (Figure 6). Discovery of D-  
353 CAN adds to a growing list of metabolites produced as a result of plant-soil feedbacks and  
354 contributes to chemical ecology. [56–58].

355 Since amino acid enantiomers have different functions, racemization of CAN may lead to  
356 multiple environmental effects. On one side, Bsr racemization of L-CAN to D-CAN decreases  
357 the concentration of the L-CAN, alleviating its toxic effect on plants [27]. In addition, Bsr  
358 produces D-CAN, a molecule that alters bacterial PG composition (Figure 6).

359 PG editing is a mechanism by which the environment can regulate the cell wall structure and  
360 biosynthesis. Whether this regulation is positive or detrimental seems to depend both on the  
361 type of D-amino acid and on the bacteria species. For instance, although *Vibrio cholerae*  
362 produces and incorporates both D-Arg and D-Met in its PG, only the latter has an effect on cell  
363 wall synthesis [20]. In the particular case of D-CAN, it seems clear that the most sensitive  
364 species were those with polar growth and higher levels of D-CAN in the PG. Indeed, many

365 Rhizobiales elongate unidirectionally by adding PG to the new pole, generated after cell division  
366 [59]. When new cell compartment gets bigger in length and width, the zone of active PG growth  
367 together with division proteins localize to midcell prior to cell division. *A. tumefaciens* encodes  
368 multiple LD-transpeptidases (e.g. 14 Ldts in *A. tumefaciens* compared to just two predicted  
369 orthologues in *P. putida*) and different Ldts are localized to the new pole or midcell, and  
370 presumably important for both polar growth and division [51]. Ldts are the enzymes that perform  
371 mDAP-mDAP crosslinks, which are very abundant in Rhizobiales (40-50% in *A. tumefaciens*)  
372 compared to e.g. *P. putida* (ca. 1 %), and catalyze PG editing in the 4<sup>th</sup> position of the peptide  
373 moieties [17]. Therefore, free D-CAN might act as a competitive substrate on Ldts to prevent  
374 their LD-crosslinking activity in favor of high D-CAN incorporation. In fact, D33 and D34 LD-  
375 crosslinked dimers are significantly reduced in the presence of D-CAN. The high number of Ldt  
376 paralogs in these species suggest they are important for the lifestyle of these organisms and  
377 thus might be difficult to assess whether a D-CAN deleterious effect can be suppressed in a Ldt-  
378 deficient strain. Another target of D-CAN inhibition might be DD-carboxypeptidases, enzymes  
379 that remove the terminal D-Ala from pentapeptides (M5). Accumulation of both the canonical (D-  
380 Ala-terminated pentapeptides) and the non-canonical (D-CAN-pentapeptides) in the presence of  
381 D-CAN strongly suggest that free D-CAN decreases the activity of *A. tumefaciens* DD-  
382 carboxypeptidases.

383 Interestingly, our suppressor analyses did not identify any mutations in Ldts or DD-  
384 carboxypeptidases that improved the growth of *A. tumefaciens* in the presence of D-CAN. The  
385 high number of Ldt and DD-carboxypeptidase paralogues (14 and 4 predicted, respectively)  
386 makes very unlikely that a single mutation in these proteins would show a suppressor effect.  
387 Instead, we discovered that a K537R point mutation in the PBP3a (*atu2100*) is sufficient to  
388 alleviate D-CAN sensitivity in *A. tumefaciens*. There are two important evidences in agreement  
389 with the idea of D-CAN targeting PBP3a: i) PBP3a has been reported to localize at the septum

390 and be involved in cell division. Consistently, D-CAN induces branching and bulging in the wt  
391 and the PBP3a K537R mutation suppresses this phenotype. li) PBP3a is a DD-transpeptidase.  
392 Inhibition of these enzymes reduce crosslinkage levels and increase accumulation of the  
393 monomeric substrates (pentapeptide and/or tetrapeptide monomers, i.e. M5 and M4,  
394 respectively). Indeed, D-CAN induces M5 accumulation in the wt, which is suppressed in the  
395 K537R mutant. Overall DD-crosslinkage is not reduced by D-CAN, but it's possible that D-CAN  
396 targets PBP3a and other PBPs are not inhibited.

397 The nature of the observed increase in D34 dimers in the K537R mutant seems to be indirect  
398 while yet connected to the presence of D-CAN. D34 dimers are formed between two monomer  
399 tetrapeptides (M4) by LD- transpeptidases, not by PBP3a, which is DD-transpeptidase and  
400 would produce a D43 dimer instead. One might speculate that PG analysis gives overview on  
401 overall PG structure, however structural changes in the septal PBP3a might have allosteric  
402 consequences on nearby enzymes within a same protein complex. In this line, it has been  
403 reported that several Ldt enzymes predominantly localize to the midcell at cell division in *A.*  
404 *tumefaciens* [51]. Therefore, it might possible that PBP3a K537R mutation influences the activity  
405 of septal Ldts. Alternatively, PBP3a K537R mutation might induce allosteric regulatory changes  
406 in DD-carboxypeptidase at the septum, leading to local consumption of pentapeptides at cell  
407 division and increase in the levels of M4, which as Ldt substrates, can boost formation of D34.  
408 Collectively, these results suggest that D-CAN incorporation downregulates PBP3a, among  
409 other cell wall associated activities, to inhibit PG synthesis, cell division and induce cell lysis  
410 (Figure 6). We hypothesize that K537R substitution might change the properties of the loop  
411 between  $\beta 5$  and  $\lambda 11$ , which is proximal to the active-site cleft to preserve PBP3a activity while  
412 making it insensitive to D-CAN. Understanding the structural changes that K-R mutation induces  
413 in the PBP3a structure might provide insights about the underlying mechanisms behind D-CAN  
414 tolerance in other bacterial species.

415 Finally, we have demonstrated that D-CAN affects *S. medicae*'s capacity to facilitate nitrogen-  
416 fixation to *M. sativa* (Figure 6). Whether this phenomenon occurs as a consequence of D-CAN  
417 impairing the symbiont's general fitness or a more specific cellular process is something that still  
418 needs to be determined. However, recent studies have shown that a DD-carboxypeptidase is  
419 critical for bacteroid (specialized nitrogen-fixing cells) differentiation in *Bradyrhizobium* spp. [60,  
420 61], which is consistent with our results of D-CAN downregulating these PG enzymes.

421 All in all, the ubiquity of bacteria encoding Bsr enzymes strongly suggests that amino acid  
422 racemization is an evolutionary driver of cell wall chemical plasticity in the environment. Future  
423 research on these enzymes will uncover more interkingdom/interspecies regulatory networks as  
424 well as shed new light on how the chirality of amino acids can impact the biodiversity in natural  
425 ecosystems.

426

#### 427 **Acknowledgements**

428 We thank all the members of the Cava lab for helpful discussions. Research in the Cava lab is  
429 supported by The Swedish Research Council (VR), The Knut and Alice Wallenberg Foundation  
430 (KAW), The Laboratory of Molecular Infection Medicine Sweden (MIMS) and The Kempe  
431 Foundation. Research in the Kondorosi lab is supported by the Frontline Research project  
432 KKP129924 from the Hungarian National Office for Research, Development and Innovation and  
433 by the Balzan research grant to É. Kondorosi. Research in the Brown lab is supported by the  
434 National Science Foundation, IOS1557806.

435

#### 436 **Conflict of interest**

437 The authors declare no conflict of interest.

438 **References**

- 439 1. Keller L, Surette MG. Communication in bacteria: An ecological and evolutionary  
440 perspective. *Nat Rev Microbiol* 2006; **4**: 249–258.
- 441 2. Duran P, Thiergart T, Garrido-Oter R, Agler M, Kemen E, Schulze-Lefert P, et al.  
442 Microbial Interkingdom Interactions in Roots Promote Arabidopsis Survival. *Cell* 2018;  
443 **175**: 973-983.e14.
- 444 3. Romano JD, Kolter R. Pseudomonas-Saccharomyces Interactions: Influence of Fungal  
445 Metabolism on Bacterial Physiology and Survival. *J Bacteriol* 2005; **187**: 940–948.
- 446 4. Mandel MJ, Wollenberg MS, Stabb E V., Visick KL, Ruby EG. A single regulatory gene is  
447 sufficient to alter bacterial host range. *Nature* 2009; **458**: 215–218.
- 448 5. Poliakov A, Russell CW, Ponnala L, Hoops HJ, Sun Q, Douglas AE, et al. Large-scale  
449 label-free quantitative proteomics of the pea aphid- Buchnera Symbiosis. *Mol Cell*  
450 *Proteomics* 2011; **10**: M110.007039.
- 451 6. Kim D-R, Cho G, Jeon C-W, Weller DM, Thomashow LS, Paulitz TC, et al. A mutualistic  
452 interaction between Streptomyces bacteria, strawberry plants and pollinating bees. *Nat*  
453 *Commun* 2019; **10**: 4802.
- 454 7. Long SR. Rhizobium-legume nodulation: Life together in the underground. *Cell* 1989; **56**:  
455 203–214.
- 456 8. Westhoek A, Field E, Rehling F, Mulley G, Webb I, Poole PS, et al. Policing the legume-  
457 Rhizobium symbiosis: a critical test of partner choice. *Sci Rep* 2017; **7**: 1419.
- 458 9. Shaw LJ, Morris P, Hooker JE. Perception and modification of plant flavonoid signals by  
459 rhizosphere microorganisms. *Environ Microbiol* 2006; **8**: 1867–1880.

- 460 10. Djordjevic MA, Redmond JW, Batley M, Rolfe BG. Clovers secrete specific phenolic  
461 compounds which either stimulate or repress nod gene expression in *Rhizobium trifolii*.  
462 *EMBO J* 1987; **6**: 1173–1179.
- 463 11. Zhang J, Subramanian S, Stacey G, Yu O. Flavones and flavonols play distinct critical  
464 roles during nodulation of *Medicago truncatula* by *Sinorhizobium meliloti*. *Plant J* 2009;  
465 **57**: 171–183.
- 466 12. Doebeli M, Knowlton N. The evolution of interspecific mutualisms. *Proc Natl Acad Sci U S*  
467 *A* 1998; **95**: 8676–8680.
- 468 13. Berendsen RL, Vismans G, Yu K, Song Y, de Jonge R, Burgman WP, et al. Disease-  
469 induced assemblage of a plant-beneficial bacterial consortium. *ISME J* 2018; **12**: 1496–  
470 1507.
- 471 14. Scott JJ, Oh DC, Yuceer MC, Klepzig KD, Clardy J, Currie CR. Bacterial protection of  
472 beetle-fungus mutualism. *Science (80- )* 2008; **322**: 63.
- 473 15. Venturi V, Keel C. Signaling in the Rhizosphere. *Trends Plant Sci* 2016; **21**: 187–198.
- 474 16. Lam H, Oh D-C, Cava F, Takacs CN, Clardy J, de Pedro MA, et al. D-Amino Acids  
475 Govern Stationary Phase Cell Wall Remodeling in Bacteria. *Science (80- )* 2009; **325**:  
476 1552–1555.
- 477 17. Cava F, de Pedro M a, Lam H, Davis BM, Waldor MK. Distinct pathways for modification  
478 of the bacterial cell wall by non-canonical D-amino acids. *EMBO J* 2011; **30**: 3442–53.
- 479 18. Hernandez SB, Dorr T, Waldor MK, Cava F. Modulation of Peptidoglycan Synthesis by  
480 Recycled Cell Wall Tetrapeptides. *Cell Rep* 2020; **31**: 107578.

- 481 19. Hills GM. Chemical factors in the germination of spore-bearing aerobes; the effects of  
482 amino acids on the germination of *Bacillus anthracis*, with some observations on the  
483 relation of optical form to biological activity. *Biochem J* 1949; **45**: 363–370.
- 484 20. Alvarez L, Aliashkevich A, de Pedro MA, Cava F. Bacterial secretion of D-arginine  
485 controls environmental microbial biodiversity. *ISME J* 2018; **12**: 438–450.
- 486 21. Aliashkevich A, Alvarez L, Cava F. New insights into the mechanisms and biological roles  
487 of D-amino acids in complex eco-systems. *Front Microbiol* 2018; **9**: 1–11.
- 488 22. Kuru E, Radkov A, Meng X, Egan A, Alvarez L, Dowson A, et al. Mechanisms of  
489 Incorporation for D-Amino Acid Probes That Target Peptidoglycan Biosynthesis. *ACS*  
490 *Chem Biol* 2019; **14**: 2745–2756.
- 491 23. Espaillet A, Carrasco-López C, Bernardo-García N, Pietrosevoli N, Otero LH, Álvarez L,  
492 et al. Structural basis for the broad specificity of a new family of amino-acid racemases.  
493 *Acta Crystallogr D Biol Crystallogr* 2014; **70**: 79–90.
- 494 24. BELL EA. Canavanine and related compounds in Leguminosae. *Biochem J* 1958; **70**:  
495 617–619.
- 496 25. Rosenthal AG, Nkomo P. The natural abundance of L-canavanine, an active anticancer  
497 agent, in Alfalfa, *Medicago sativa* (L.). *Pharm Biol* 2000; **38**: 1–6.
- 498 26. Megías C, Cortés-Giraldo I, Girón-Calle J, Vioque J, Alaiz M. Determination of L-  
499 canavanine and other free amino acids in *Vicia disperma* (Fabaceae) seeds by  
500 precolumn derivatization using diethyl ethoxymethylenemalonate and reversed-phase  
501 high-performance liquid chromatography. *Talanta* 2015; **131**: 95–98.
- 502 27. Miersch J, Jühlke C, Sternkopf G, Krauss GJ. Metabolism and exudation of canavanine



- 503 during development of alfalfa (*Medicago sativa* L. cv. verko). *J Chem Ecol* 1992; **18**:  
504 2117–2129.
- 505 28. Pines M, Rosenthal GA, Applebaum SW. In vitro incorporation of L-canavanine into  
506 vitellogenin of the fat body of the migratory locust *Locusta migratoria migratorioides*. *Proc*  
507 *Natl Acad Sci U S A* 1982; **78**: 5480–5483.
- 508 29. Rosenthal GA, Dahlman DL. Studies of L-canavanine incorporation into insectan  
509 lysozyme. *J Biol Chem* 1991; **266**: 15684–15687.
- 510 30. Rosenthal GA, Lambert J, Hoffmann D. Canavanine incorporation into the antibacterial  
511 proteins of the fly, *Phormia terranovae* (Diptera), and its effect on biological activity. *J Biol*  
512 *Chem* 1989; **264**: 9768–9771.
- 513 31. Desmarais SM, De Pedro M a, Cava F, Huang KC. Peptidoglycan at its peaks: how  
514 chromatographic analyses can reveal bacterial cell wall structure and assembly. *Mol*  
515 *Microbiol* 2013; **89**: 1–13.
- 516 32. Alvarez L, Hernandez SB, de Pedro MA, Cava F. Ultra-Sensitive, High-Resolution Liquid  
517 Chromatography Methods for the High-Throughput Quantitative Analysis of Bacterial Cell  
518 Wall Chemistry and Structure. *Methods Mol Biol* 2016; **1440**: 11–27.
- 519 33. Bhushan R, Bruckner H. Marfey's reagent for chiral amino acid analysis: a review. *Amino*  
520 *Acids* 2004; **27**: 231–247.
- 521 34. Donnenberg MS, Kaper JB. Construction of an *eae* deletion mutant of enteropathogenic  
522 *Escherichia coli* by using a positive-selection suicide vector. *Infect Immun* 1991; **59**:  
523 4310–4317.
- 524 35. Ducret A, Quardokus EM, Brun Y V. MicrobeJ, a tool for high throughput bacterial cell

- 525 detection and quantitative analysis. *Nat Microbiol* 2016; **1**: 16077.
- 526 36. Morton ER, Fuqua C. Laboratory maintenance of *Agrobacterium*. *Curr Protoc Microbiol*  
527 2012; **Chapter 1**: Unit3D.1.
- 528 37. Howell M, Daniel JJ, Brown PJB. Live Cell Fluorescence Microscopy to Observe  
529 Essential Processes During Microbial Cell Growth. *J Vis Exp* 2017.
- 530 38. Andrews S. FastQC: A quality control tool for high throughput sequence data. Available  
531 at: <http://www.bioinformatics.babraham.ac.uk/projects/fastqc>. 2010.
- 532 39. Ewels P, Magnusson M, Lundin S, Källér M. MultiQC: summarize analysis results for  
533 multiple tools and samples in a single report. *Bioinformatics* 2016; **32**: 3047–3048.
- 534 40. Bolger AM, Lohse M, Usadel B. Trimmomatic: a flexible trimmer for Illumina sequence  
535 data. *Bioinformatics* 2014; **30**: 2114–2120.
- 536 41. Wood DW, Setubal JC, Kaul R, Monks DE, Kitajima JP, Okura VK, et al. The genome of  
537 the natural genetic engineer *Agrobacterium tumefaciens* C58. *Science* 2001; **294**: 2317–  
538 2323.
- 539 42. Li H. Aligning sequence reads, clone sequences and assembly contigs with BWA-MEM.  
540 *arXiv:13033997v2* 2013.
- 541 43. Picard tools. Available online at: <http://broadinstitute.github.io/picard>.
- 542 44. Erik G, Gabor M. Haplotype-based variant detection from short-read sequencing. *arXiv*  
543 *Prepr arXiv12073907* 2012.
- 544 45. Fischer B, Rummel G, Aldridge P, Jenal U. The FtsH protease is involved in  
545 development, stress response and heat shock control in *Caulobacter crescentus*. *Mol*

- 546 *Microbiol* 2002; **44**: 461–478.
- 547 46. Morton ER, Fuqua C. Genetic manipulation of *Agrobacterium*. *Curr Protoc Microbiol*  
548 2012; **Chapter 3**: Unit 3D.2.
- 549 47. Kelley LA, Mezulis S, Yates CM, Wass MN, Sternberg MJE. The Phyre2 web portal for  
550 protein modeling, prediction and analysis. *Nat Protoc* 2015; **10**: 845–858.
- 551 48. Dahlman DL, Rosenthal GA. Non-protein aminoacid-insect interactions--I. Growth effects  
552 and symptomology of L-canavanine consumption by tobacco hornworm, *Manduca sexta*  
553 (L.). *Comp Biochem Physiol A Comp Physiol* 1975; **51**: 33–36.
- 554 49. Dahlman DL, Rosenthal GA. Further studies of the effect of L-canavanine on the tobacco  
555 hornworm, *Manduca sexta*. *J Insect Physiol* 1976; **22**: 265–271.
- 556 50. Dörr T, Lam H, Alvarez L, Cava F, Davis BM, Waldor MK. A Novel Peptidoglycan Binding  
557 Protein Crucial for PBP1A-Mediated Cell Wall Biogenesis in *Vibrio cholerae*. *PLoS Genet*  
558 2014; **10**: e1004433.
- 559 51. Cameron TA, Anderson-Furgeson J, Zupan JR, Zik JJ, Zambryski PC. Peptidoglycan  
560 synthesis machinery in *Agrobacterium tumefaciens* during unipolar growth and cell  
561 division. *MBio* 2014; **5**: 1–10.
- 562 52. Figueroa-Cuilan WM, Brown PJB. Cell Wall Biogenesis During Elongation and Division in  
563 the Plant Pathogen *Agrobacterium tumefaciens*. *Curr Top Microbiol Immunol* 2018; **418**:  
564 87–110.
- 565 53. Horcajo P, De Pedro MA, Cava F. Peptidoglycan plasticity in bacteria: Stress-induced  
566 peptidoglycan editing by noncanonical D-amino acids. *Microb Drug Resist* 2012; **18**: 306–  
567 313.

- 568 54. Espaillet A, Forsmo O, El Biari K, Björk R, Lemaitre B, Trygg J, et al. Chemometric  
569 Analysis of Bacterial Peptidoglycan Reveals Atypical Modifications That Empower the  
570 Cell Wall against Predatory Enzymes and Fly Innate Immunity. *J Am Chem Soc* 2016;  
571 **138**: 9193–9204.
- 572 55. Yadav AK, Espaillet A, Cava F. Bacterial strategies to preserve cell wall integrity against  
573 environmental threats. *Front Microbiol* 2018; **9**: 1–9.
- 574 56. Hu L, Robert CAM, Cadot S, Zhang X, Ye M, Li B, et al. Root exudate metabolites drive  
575 plant-soil feedbacks on growth and defense by shaping the rhizosphere microbiota. *Nat*  
576 *Commun* 2018; **9**: 1–13.
- 577 57. Planchamp C, Glauser G, Mauch-mani B. Root inoculation with *Pseudomonas putida*  
578 KT2440 induces transcriptional and metabolic changes and systemic resistance in maize  
579 plants. 2015; **5**: 1–10.
- 580 58. Etalo DW, Jeon J-S, Raaijmakers JM. Modulation of plant chemistry by beneficial root  
581 microbiota. *Nat Prod Rep* 2018; **35**: 398–409.
- 582 59. Brown PJB, Pedro MA De, Kysela DT, Henst C Van Der, Kim J, Bolle X De, et al. Polar  
583 growth in the Alphaproteobacterial order Rhizobiales. *PNAS* 2011; **109**: 1697/1701.
- 584 60. Gully D, Gargani D, Bonaldi K, Grangeteau C, Chaintreuil C, Fardoux J, et al. A  
585 Peptidoglycan-remodeling enzyme is critical for bacteroid differentiation in  
586 *Bradyrhizobium* spp. during legume symbiosis. *Mol Plant-Microbe Interact* 2016; **29**: 447–  
587 457.
- 588 61. Barrière Q, Guefrachi I, Gully D, Lamouche F, Pierre O, Fardoux J, et al. Integrated roles  
589 of BclA and DD-carboxypeptidase 1 in *Bradyrhizobium* differentiation within NCR-

590 producing and NCR-lacking root nodules. *Sci Rep* 2017; **7**: 1–13.

591

592 **Figure legends**

593 **Fig. 1** D-canavanine is produced from L-canavanine. (a) Scheme of PG-modifying metabolites  
594 identification. Modified M4 was found in the sample grown with *Medicago sativa* (alfalfa) seeds  
595 extract. (b) Cell wall analysis of *P. putida*, grown without (control) or with addition of L-  
596 canavanine 5 mM. (c) HPLC analysis of Marfey's derivatized L-canavanine and L-canavanine  
597 incubated with *P. putida* broad-spectrum racemase. (d) Cell wall analysis of *P. putida* wt and  
598  $\Delta$ *bsrP* mutant, grown in the presence of L-canavanine 5 mM.

599 **Fig. 2** Functionality of D-canavanine is different from L-canavanine. Root length in *A. thaliana*  
600 grown on ½ Murashige-Skoog agar supplemented with L- or DL-canavanine 5  $\mu$ M or not  
601 (control). Pictures show representative plants. P value < 0.0001 (\*\*\*).

602 **Fig. 3** High D-canavanine incorporation changes structure and amount of peptidoglycan in *A.*  
603 *tumefaciens*. (a) Sensitivity of soil and ubiquitous bacteria to DL-canavanine. Relative growth  
604 was calculated for bacteria grown in the presence of 5 mM DL-canavanine. D-canavanine  
605 incorporation was measured for bacteria supplemented with 2.5 mM DL-canavanine. (b)  
606 Representative PG profiles of *A. tumefaciens* supplemented with DL-canavanine 10 mM or not  
607 (control). Illustrations show D-canavanine-containing muropeptides. (c) PG amount  
608 quantification in 10 mM DL-canavanine supplemented *A. tumefaciens* cultures normalized to  
609 control (no canavanine). P-value < 0.05 (\*). (d) Abundance of D-canavanine-containing  
610 muropeptides in *A. tumefaciens* supplemented with 10 mM DL-canavanine. Monomer M4<sup>G</sup> and  
611 dimer D34<sup>G</sup> are calculated as part of non-modified M4 and D34. (e) Abundance of monomers,  
612 dimers and trimers in *A. tumefaciens* supplemented with 10 mM DL-canavanine. Abundance of  
613 LD- and DD-crosslinked muropeptides in *A. tumefaciens* supplemented with 10 mM DL-  
614 canavanine. P value < 0.0001 (\*\*\*).

615 **Fig. 4** D-canavanine inhibits growth of *A. tumefaciens* and leads to aberrant cell morphology. (a)  
616 Growth curves of *A. tumefaciens* in the absence (control) or presence of L- or DL-canavanine

617 10 mM, and phase contrast images of *A. tumefaciens* cells without (control) or supplemented  
618 with L- or DL-canavanine 10 mM. Scale bar 2  $\mu$ m. (b) Longitudinal position of cell constriction in  
619 *A. tumefaciens* cells without (control) or with DL-canavanine 10 mM. New pole is marked by  
620 green color, old pole – by blue. (c) Number of constrictions per cell in *A. tumefaciens* grown  
621 without (control) or with DL-canavanine 10 mM.

622 **Fig. 5** K537R amino acid change in *A. tumefaciens* PBP3a protein provides resistance to D-  
623 canavanine. (a) Position of the PBP3a K537R amino acid change in the protein scheme and in  
624 the protein structural prediction. (b) Growth curves of *A. tumefaciens* wild-type and PBP3a<sup>K537R</sup>  
625 in the presence of DL-canavanine 10 mM. (c) PG amount quantification in 10 mM DL-  
626 canavanine supplemented *A. tumefaciens* wild-type and PBP3a<sup>K537R</sup> cultures normalized to wild-  
627 type control (no canavanine). P-value < 0.05 (\*). (d) Quantification of the monomer (M5) and  
628 dimer (D34) abundance in *A. tumefaciens* wild-type and PBP3a<sup>K537R</sup> grown with DL-canavanine  
629 10 mM. P-value < 0.005 (\*\*) and < 0.0001 (\*\*\*). (e) Abundance of monomers, dimers and  
630 trimers in *A. tumefaciens* wild-type and PBP3a<sup>K537R</sup> supplemented with 10 mM DL-canavanine.  
631 P-value < 0.05 (\*). (f) Longitudinal position of cell constriction in *A. tumefaciens* wild-type and  
632 PBP3a<sup>K537R</sup> cells without (control) or with DL-canavanine 7.5 mM. New pole is marked by green  
633 color, old pole – by blue.

634 **Fig. 6** Model illustrating the impact of L- to D-CAN conversion on the soil-plant ecosystem. CAN  
635 enantiomerization by Bsr bacteria (e. g. *P. putida*) detoxifies L-CAN for non-legume plants. D-  
636 CAN inhibits Rhizobiales bacteria (e. g. *S. meliloti*, *A. tumefaciens*), thus modulating microbial  
637 diversity in the soil.

638

639

640

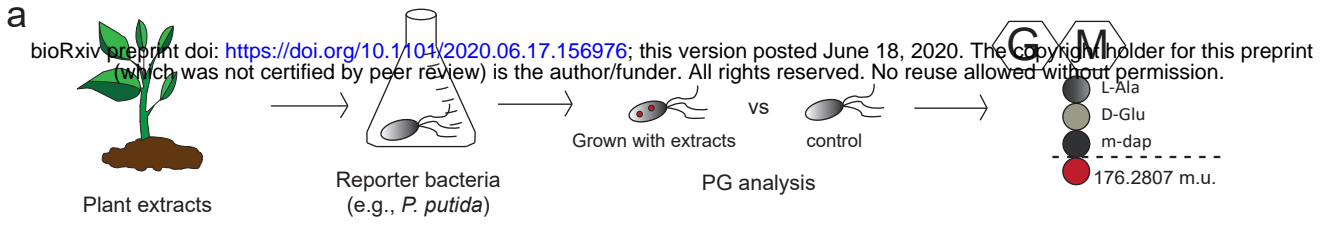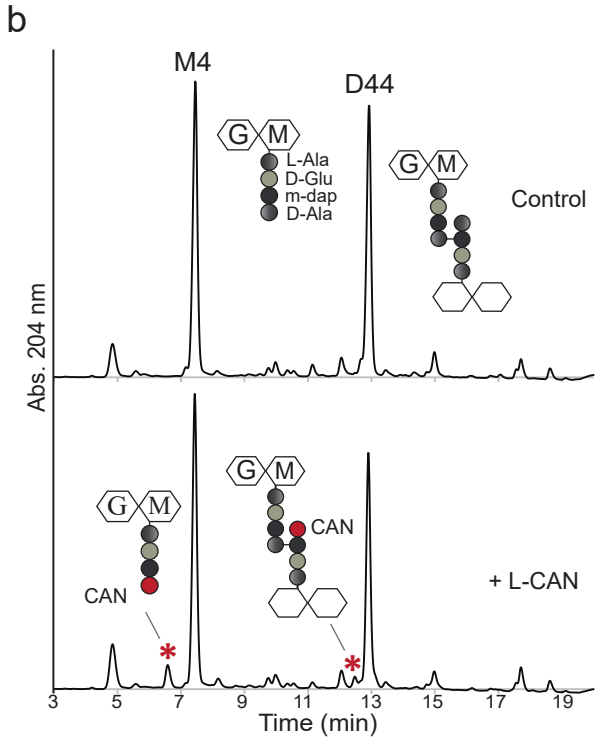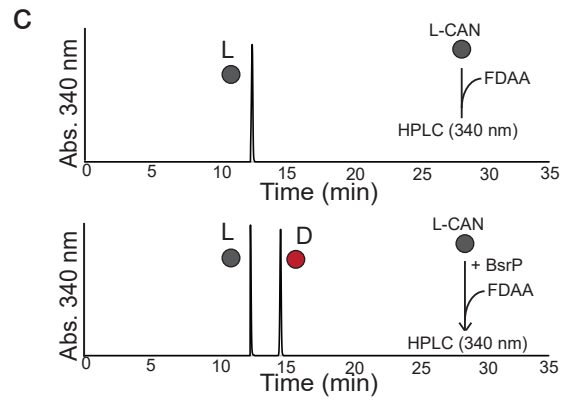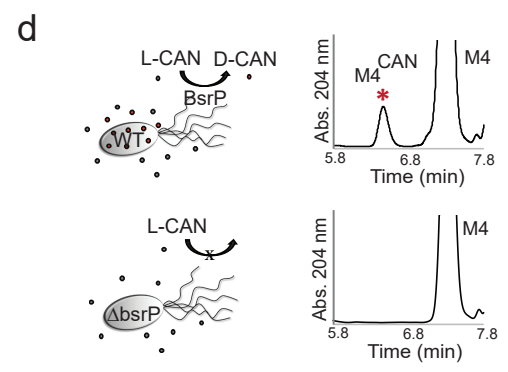

Figure 1



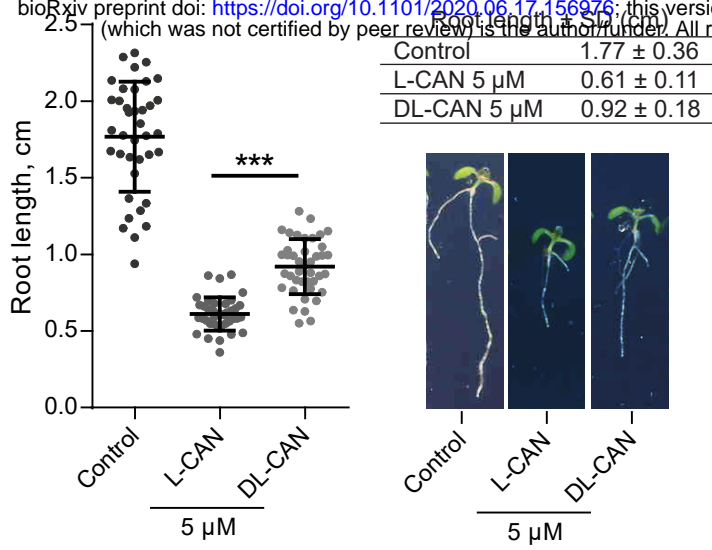

Figure 2

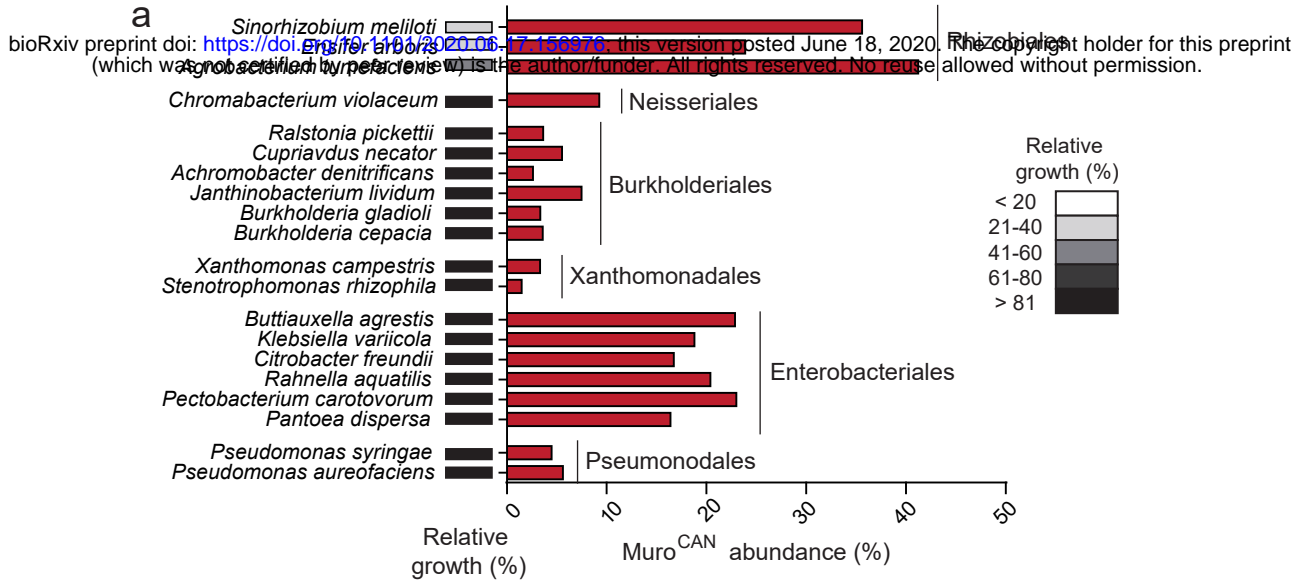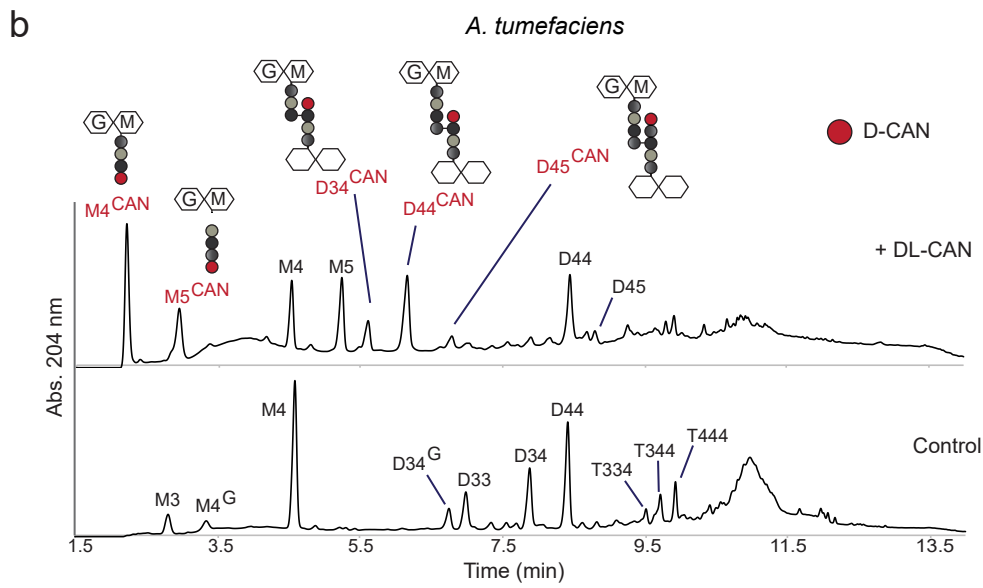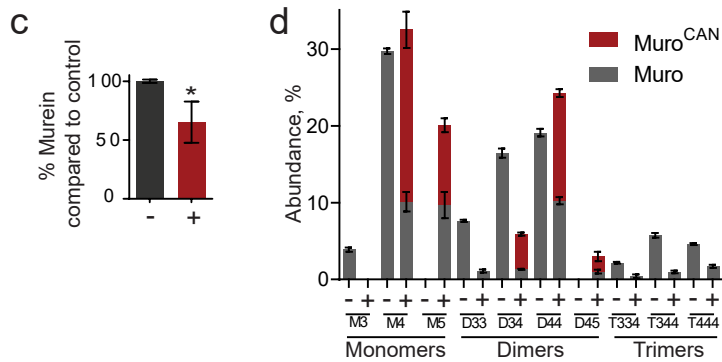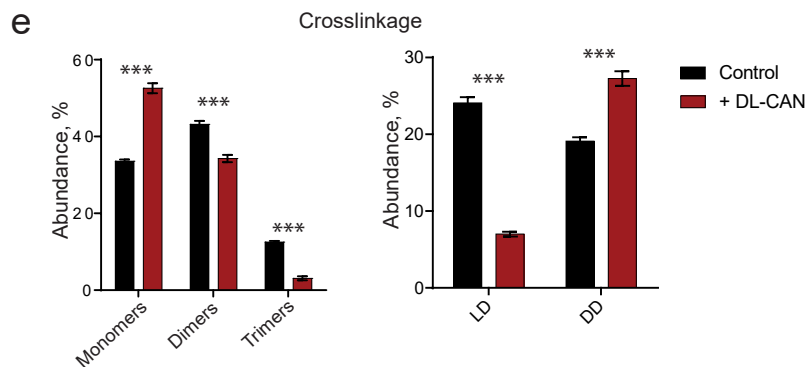

Figure 3

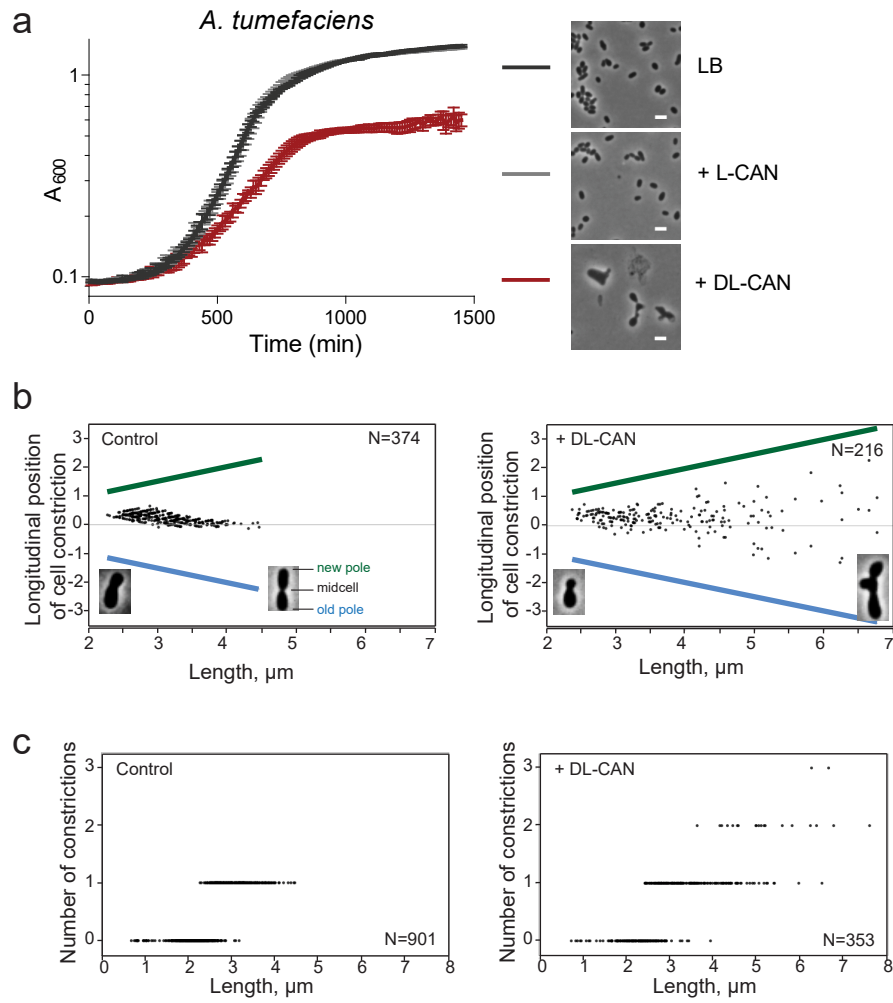

Figure 4

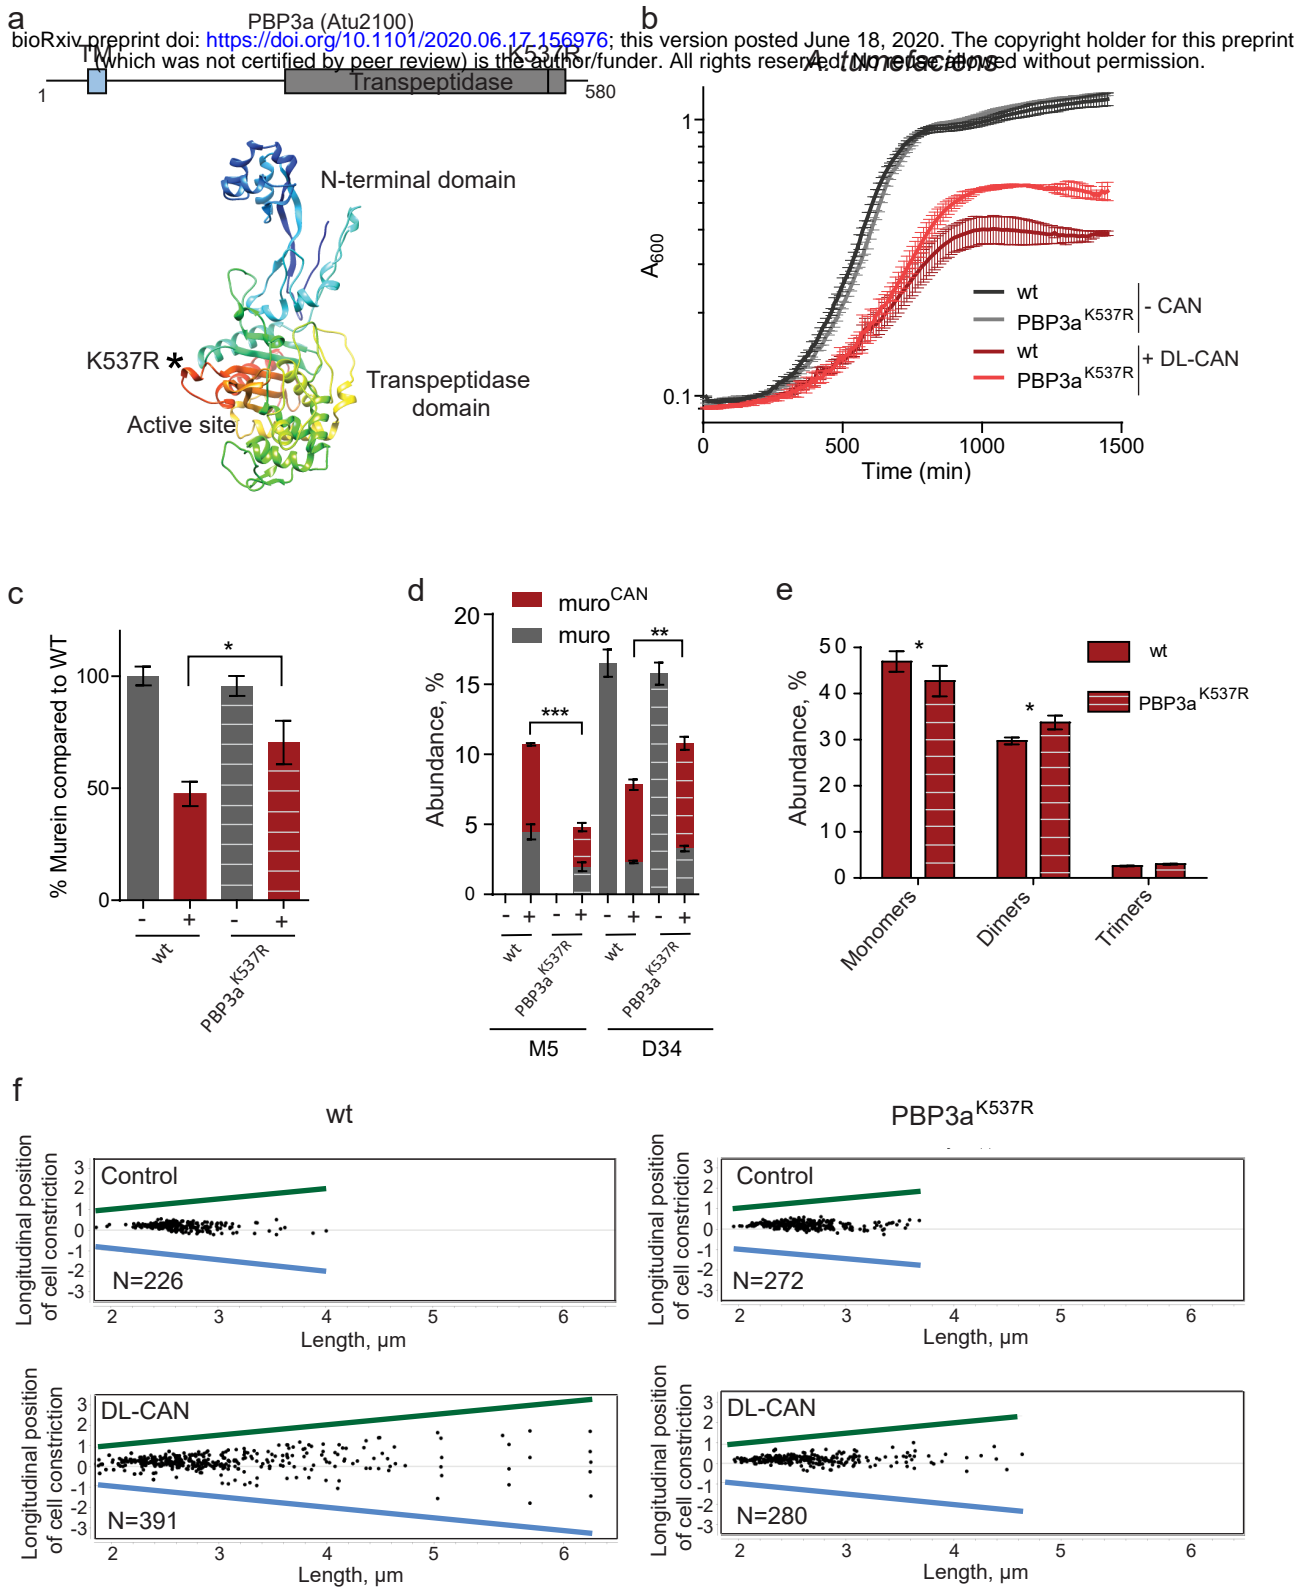

Figure 5

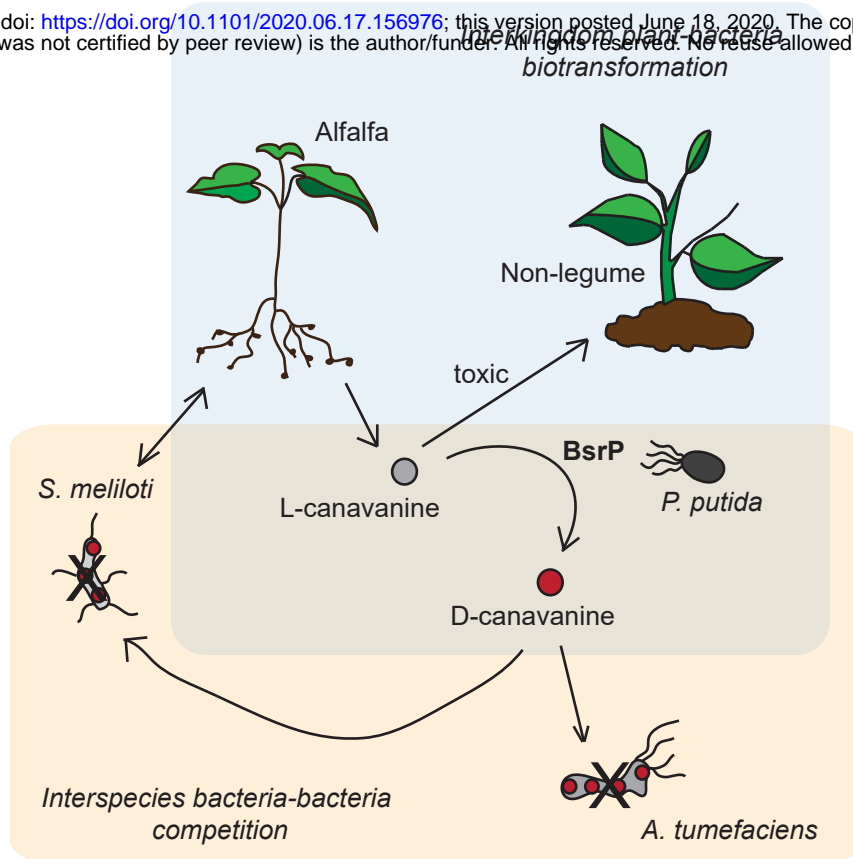

Figure 6
